# Supplementary material for: Asthma and COPD Overlap Syndrome (ACOS): A Systematic Review and Meta Analysis
Source: PLOS journal article supplement (doi:10.1371/journal.pone.0136065), 2015-09-03
Supplement: S2 (10.1371/journal.pone.0136065.s002) [file journal.pone.0136065.s002]

| Search number             | Search Terms*                                                                                                                                                                                                                                                                                                                                                                                                                                                  |
|---------------------------|----------------------------------------------------------------------------------------------------------------------------------------------------------------------------------------------------------------------------------------------------------------------------------------------------------------------------------------------------------------------------------------------------------------------------------------------------------------|
| <b>COPD</b>               |                                                                                                                                                                                                                                                                                                                                                                                                                                                                |
| #1                        | "pulmonary disease, chronic obstructive"[MeSH Terms] OR "chronic obstructive pulmonary disease"[Text Word] OR "copd"[Text Word] OR "pulmonary emphysema"[MeSH Terms] OR "emphysema"[Text Word] OR "bronchitis, chronic"[MeSH Terms] OR "chronic bronchitis"[Text Word]                                                                                                                                                                                         |
| <b>Asthma</b>             |                                                                                                                                                                                                                                                                                                                                                                                                                                                                |
| #2                        | "asthma"[MeSH Terms] OR "asthma"[Text Word]                                                                                                                                                                                                                                                                                                                                                                                                                    |
| <b>ACOS</b>               |                                                                                                                                                                                                                                                                                                                                                                                                                                                                |
| #3                        | asthma-copd overlap syndrome[Text Word] OR overlap of asthma and copd[Text Word] OR asthma and chronic obstructive pulmonary disease overlap syndrome[Text Word] OR ACOS[Text Word] OR Asthma-Chronic obstructive pulmonary disease overlap syndrome[Text Word] OR overlap of asthma and chronic obstructive pulmonary disease[Text Word]                                                                                                                      |
| #4                        | (#1 OR #2 OR #3)                                                                                                                                                                                                                                                                                                                                                                                                                                               |
| <b>Epidemiology Terms</b> |                                                                                                                                                                                                                                                                                                                                                                                                                                                                |
| #5                        | "epidemiology"[MeSH Terms] OR "incidence"[MeSH Terms] OR "prevalence"[MeSH Terms] OR ("hospital mortality"[MeSH Terms] NOT "hospital mortality/ethnology"[MeSH Terms]) OR "morbidity"[MeSH Terms]                                                                                                                                                                                                                                                              |
| #6                        | (#4 AND # 5)                                                                                                                                                                                                                                                                                                                                                                                                                                                   |
| #7                        | "pulmonary disease, chronic obstructive/epidemiology"[MeSH Major Topic] OR "pulmonary disease, chronic obstructive/mortality"[MeSH Major Topic] OR "pulmonary emphysema/epidemiology"[MeSH Major Topic] OR "pulmonary emphysema/mortality"[MeSH Major Topic] OR "bronchitis, chronic/epidemiology"[MeSH Major Topic] OR "bronchitis, chronic/mortality"[MeSH Major Topic] OR ("asthma/epidemiology"[MeSH Major Topic] OR "asthma/mortality"[MeSH Major Topic]) |
| #8                        | (#6 OR #7)                                                                                                                                                                                                                                                                                                                                                                                                                                                     |
| <b>Exclusionary Terms</b> |                                                                                                                                                                                                                                                                                                                                                                                                                                                                |
| #9                        | "comment"[Publication Type] OR "review"[Publication Type] OR "editorial"[Publication Type] OR "letter"[Publication Type] OR "clinical trial"[Publication Type]                                                                                                                                                                                                                                                                                                 |
| <b>Total</b>              |                                                                                                                                                                                                                                                                                                                                                                                                                                                                |
| #10                       | (#8 NOT #9)                                                                                                                                                                                                                                                                                                                                                                                                                                                    |

**Notes:** \*Search limits: English language, full text, and publication date from 1 January 1965 to February 01/2015.
