# Supplementary material for: Asthma and COPD Overlap Syndrome (ACOS): A Systematic Review and Meta Analysis
Source: PLOS journal article supplement (doi:10.1371/journal.pone.0136065), 2015-09-03
Supplement: S3 (10.1371/journal.pone.0136065.s003) [file journal.pone.0136065.s003]

### The modified Newcastle Ottawa scale for Cohort studies

| Selection                                                                                                                                                                                                                                                                           |                                                                                                                                                                                  |                                                                                                                                                          |                                                                                             | Comparability                                                                                                                                                                                                       | Outcome                                                                                                                           |                                                 |                                                                                                                                                                                                                                                    |
|-------------------------------------------------------------------------------------------------------------------------------------------------------------------------------------------------------------------------------------------------------------------------------------|----------------------------------------------------------------------------------------------------------------------------------------------------------------------------------|----------------------------------------------------------------------------------------------------------------------------------------------------------|---------------------------------------------------------------------------------------------|---------------------------------------------------------------------------------------------------------------------------------------------------------------------------------------------------------------------|-----------------------------------------------------------------------------------------------------------------------------------|-------------------------------------------------|----------------------------------------------------------------------------------------------------------------------------------------------------------------------------------------------------------------------------------------------------|
| Representativeness of the exposed cohort                                                                                                                                                                                                                                            | Selection of the non exposed cohort                                                                                                                                              | Ascertainment of exposure                                                                                                                                | Demonstration that outcome of interest was not present at start of study (for side effects) | Comparability of cohorts on the basis of the design or analysis                                                                                                                                                     | Assessment of outcome                                                                                                             | Was follow-up long enough for outcomes to occur | Adequacy of follow up of cohorts                                                                                                                                                                                                                   |
| a) Truly representative of the average ACOS in the community <sup>*</sup><br><br>b) Somewhat representative of the average ACOS in the community <sup>*</sup><br><br>c) Selected group of ACOS (e.g. smokers, non-smokers)<br><br>d) No description of the derivation of the cohort | a) Drawn from the same community as the exposed cohort <sup>*</sup><br><br>b) Drawn from a different source<br><br>c) No description of the derivation of the non exposed cohort | a) Secure record (e.g. clinical records) <sup>*</sup><br><br>b) Structured interview <sup>*</sup><br><br>c) Written self report<br><br>d) No description | a) Yes <sup>*</sup><br><br>b) No                                                            | a) Most important factors of adjustments (age, gender, asthma history, smoking, initial FEV1) <sup>*</sup><br><br>b) Any additional factors (level of education, socio-economic status ethnicity/race) <sup>*</sup> | a) Independent blind assessment <sup>*</sup><br><br>b) Record linkage <sup>*</sup><br><br>c) Self report<br><br>d) No description | a) Yes (10 years) <sup>*</sup><br><br>b) No     | a) Complete follow up - all subjects accounted for <sup>*</sup><br><br>b) Subjects lost to follow up unlikely to introduce bias (lost to follow up < 10 %)<br><br>c) Follow up rate < 10 % and no description of those lost<br><br>d) No statement |
