# Supplementary material for: Asthma and COPD Overlap Syndrome (ACOS): A Systematic Review and Meta Analysis
Source: PLOS journal article supplement (doi:10.1371/journal.pone.0136065), 2015-09-03
Supplement: S4 (10.1371/journal.pone.0136065.s004) [file link]

**The modified Newcastle Ottawa scale for cross sectional studies**

| <b>Selection</b>                                                                                                                                                                                                                                                     |                                                                  |                                                                                                                                                                               |                                                                                                                                                                                                                                                                                                                                                                                        | <b>Comparability</b>                                                                                                                                               | <b>Outcome</b>                                                                                                     |                                                                                                                                                                                                                                                                                                          |
|----------------------------------------------------------------------------------------------------------------------------------------------------------------------------------------------------------------------------------------------------------------------|------------------------------------------------------------------|-------------------------------------------------------------------------------------------------------------------------------------------------------------------------------|----------------------------------------------------------------------------------------------------------------------------------------------------------------------------------------------------------------------------------------------------------------------------------------------------------------------------------------------------------------------------------------|--------------------------------------------------------------------------------------------------------------------------------------------------------------------|--------------------------------------------------------------------------------------------------------------------|----------------------------------------------------------------------------------------------------------------------------------------------------------------------------------------------------------------------------------------------------------------------------------------------------------|
| <b>Representativeness of the sample</b>                                                                                                                                                                                                                              | <b>Sample size</b>                                               | <b>Ascertainment of exposure</b>                                                                                                                                              | <b>Non-respondents</b>                                                                                                                                                                                                                                                                                                                                                                 | <b>The subjects in different outcome groups are comparable, based on the study design or analysis. Confounding factors are controlled.</b>                         | <b>Assessment of outcome</b>                                                                                       | <b>Was follow-up long enough for outcomes to occur</b>                                                                                                                                                                                                                                                   |
| <p>a) Truly representative of the average ACOS in the community *</p> <p>b) Somewhat representative of the average ACOS in the community *</p> <p>c) Selected group of ACOS (e.g. smokers, non-smokers)</p> <p>d) No description of the derivation of the cohort</p> | <p>a) Justified and satisfactory. *</p> <p>b) Not justified.</p> | <p>a) Validated measurement tool. *</p> <p>b) Non-validated measurement tool, but the tool is available or described. *</p> <p>c) No description of the measurement tool.</p> | <p>a) Comparability between respondents and non-respondents characteristics is established, and the response rate is satisfactory. *</p> <p>b) The response rate is unsatisfactory, or the comparability between respondents and non-respondents is unsatisfactory.</p> <p>c) No description of the response rate or the characteristics of the responders and the non-responders.</p> | <p>a) The study controls for the most important factor (Childhood asthma). *</p> <p>b) The study control for any additional factor (age, gender, ethnicity). *</p> | <p>a) Independent blind assessment *</p> <p>b) Record linkage *</p> <p>c) Self report</p> <p>d) No description</p> | <p>a) The statistical test used to analyze the data is clearly described and appropriate, and the measurement of the association is presented, including confidence intervals and the probability level (p value). *</p> <p>b) The statistical test is not appropriate, not described or incomplete.</p> |
